# Supplementary material for: Genome-Wide Identification, Evolution, and Expression Analysis of GASA Gene Family in Prunus mume
Source: MDPI journal article supplement (doi:10.3390/ijms231810923), 2022-09-18
Supplement: s1 [file s1]

**Figure S1. Chromosomal location of *PmGASA* genes. Chromosome and scaffold sizes are indicated by their relative length.**

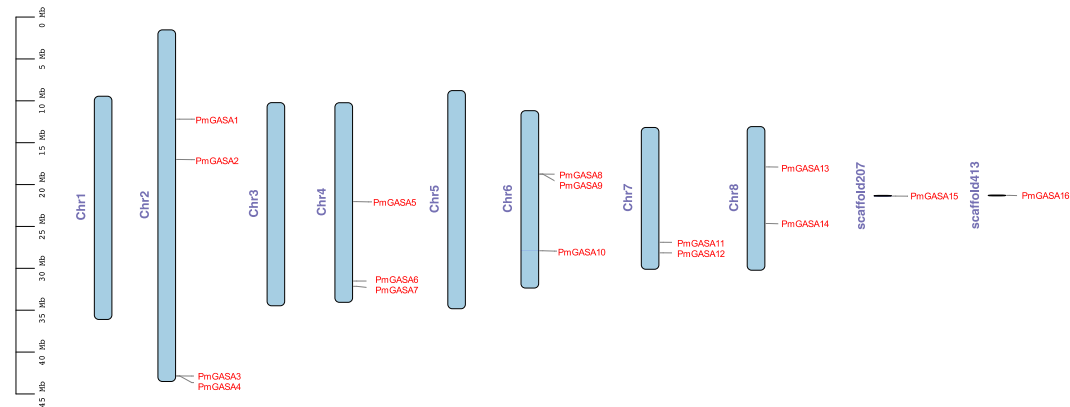

**Figure S2. Featured motifs of *PmGASA* proteins.**

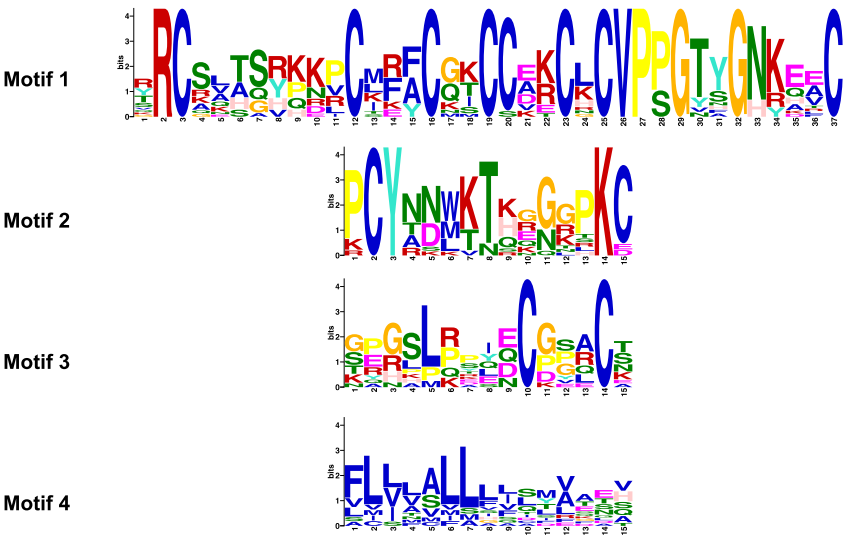

**Figure S3. Synteny analysis of *GASA* genes identified in *P. mume*. The rings represent different chromosomes and scaffolds. The grey blocks represent syntenic regions and the red lines represent collinear *GASA* gene pairs.**

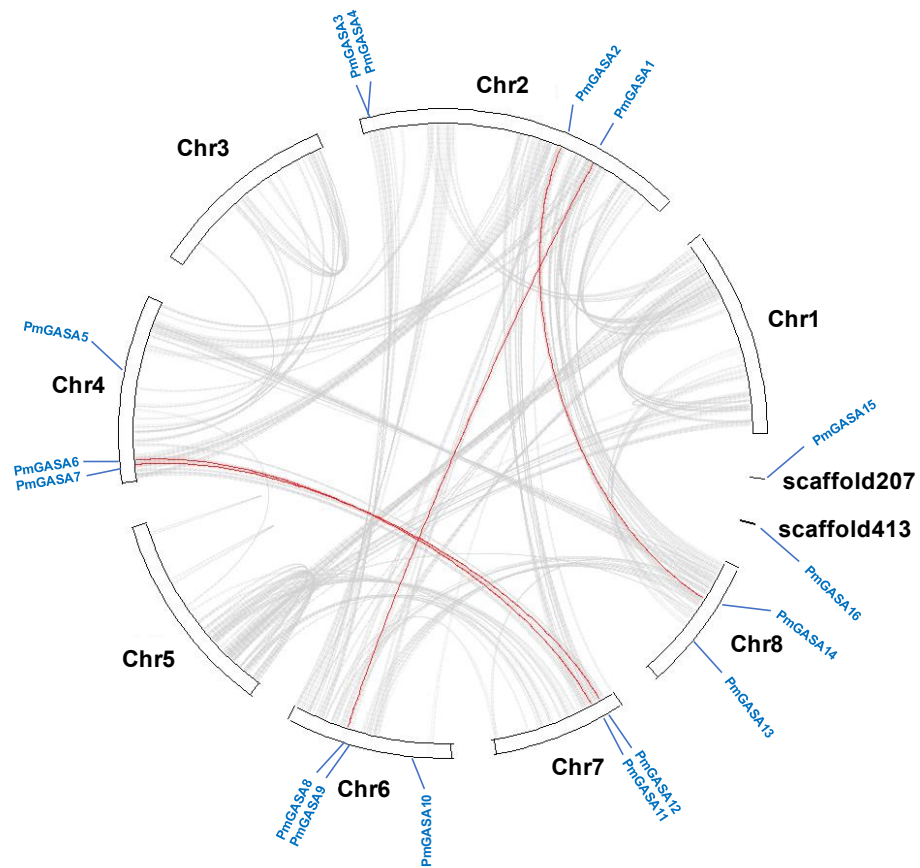

**Figure S4. Selective pressure analysis of three *PmGASA* gene clades identified positively selected sites. Amino acids in yellow shades are under positive selection and those in purple shades are under purifying selection. Amino acids were colored accordingly for clade 1, clade 2, and clade 3 with *PmGASA3*, *PmGASA9*, *PmGASA6* as reference genes, respectively.**

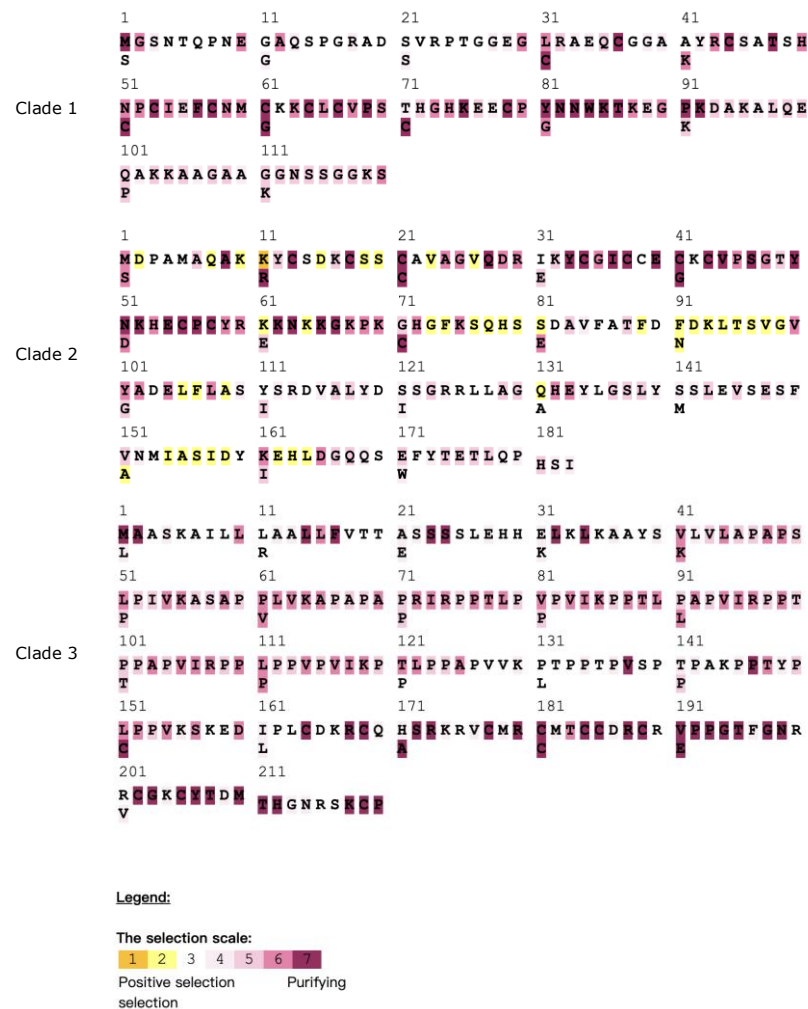

**Figure S5. The putative transcriptional regulatory network of the *PmGASA* genes constructed based on Plant Transcriptional Regulatory Map (PTRM) database.** Arrows represent the regulatory relationships between *PmGASAs* and their predicted upstream transcription factors.

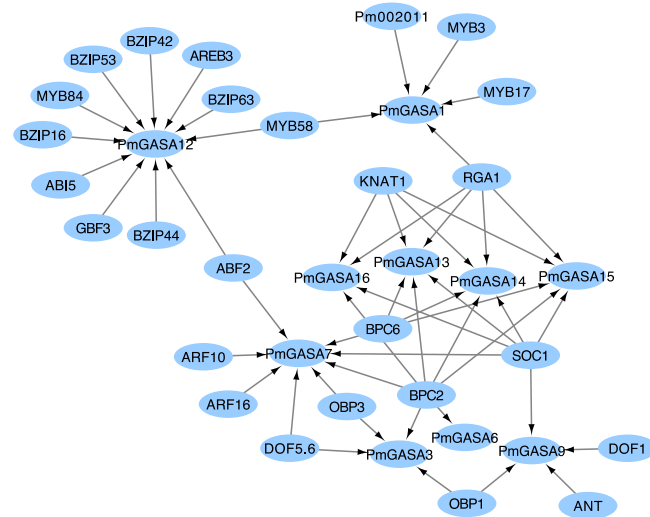

**Figure S6. Relative expression levels of *PmGASAs* in floral buds after GA treatment.** Error bars represent the standard deviations assessed from three technical replicates.

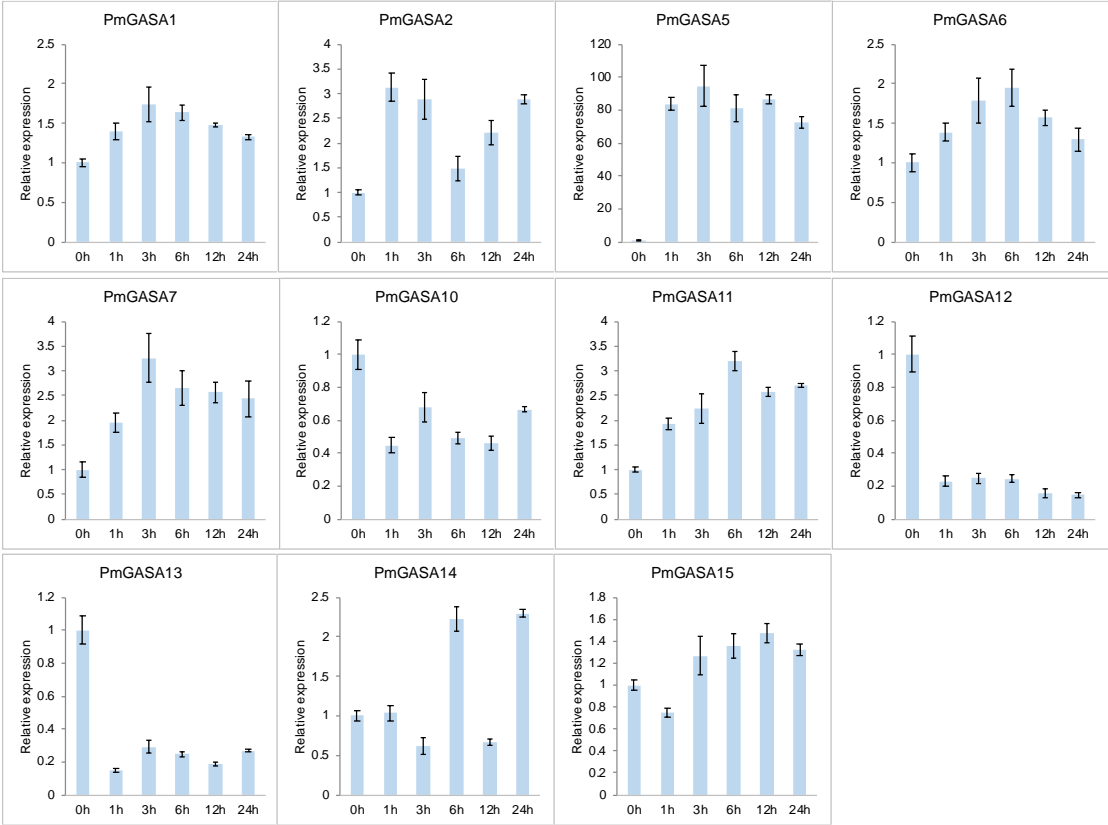

**Table S1. The primers of *PmGASA* genes used in the qRT-PCR assays.**

| Gene     | Primer     | Sequence                |
|----------|------------|-------------------------|
| PmGASA1  | Pm005363-F | GAGCGGTGCTTGAAGTACTGTG  |
|          | Pm005363-R | TTGGAGTTTTTGAGGTCCCTGT  |
| PmGASA2  | Pm006215-F | ATGGCCAAGAAGATGATGTTGA  |
|          | Pm006215-R | GGTCACCGTTTCATGAGAATCA  |
| PmGASA3  | Pm009495-F | TGCTCAGCAACTTCACACAAGA  |
|          | Pm009495-R | TGTGCCTGATGGAACACATAGA  |
| PmGASA4  | Pm009496-F | CACTTCGTCGTGAAGATTGTCC  |
|          | Pm009496-R | ACAAAGACATTTGTCTGCAGCAT |
| PmGASA5  | Pm014337-F | TCTCTGATGTGGCTGAGGGTTA  |
|          | Pm014337-R | CATTTTTGGCAGAAGAACATGC  |
| PmGASA6  | Pm015762-F | CACTCCACCAACTCCTGTCAGT  |
|          | Pm015762-R | CTCTTGTCACACAAAGGGATGC  |
| PmGASA7  | Pm015883-F | TACCACAAGCCTTGCATGTTCT  |
|          | Pm015883-R | TGGGTCTTCCAGTTGTTGTAGC  |
| PmGASA8  | Pm021248-F | TGTGTGCCTTCTGGAATTATG   |
|          | Pm021248-R | TCGTTGAGCACTTGTCATTGTG  |
| PmGASA9  | Pm021249-F | GCTTGCAGGAATTCAACATGAG  |
|          | Pm021249-R | CATCAAGGTGTTTCCTTGGCATA |
| PmGASA10 | Pm022352-F | CAGTGATGCTGCGAATTCTACC  |
|          | Pm022352-R | AGCATGCATAGTCGCAATTGAT  |
| PmGASA11 | Pm024681-F | TGGTTCTTTTGCTGGGAGTTTT  |
|          | Pm024681-R | TGCGCAAGATGAGGTAATTGTT  |
| PmGASA12 | Pm024909-F | ATGGTTGCAACACAGGTTATGG  |
|          | Pm024909-R | GCTCTTTAGACTCCCAGGACCA  |
| PmGASA13 | Pm025746-F | GCTCTCCCTCGTTATGCTTCAT  |
|          | Pm025746-R | AATTCCATTCATCGTGTGGTTG  |
| PmGASA14 | Pm026754-F | GATGATGGCTTCCCTTGTTTTTC |
|          | Pm026754-R | GCTCCATTGTTGTTTCATCGTGT |
| PmGASA15 | Pm029238-F | CCTTGTCTGTTTTTCTGCCAAA  |
|          | Pm029238-R | TGGTCCTCCTCTCTTGGTCTTC  |
| PmGASA16 | Pm030034-F | GTTATGGCGGTTTTGCTCTTCT  |
|          | Pm030034-R | CTTCTGTTTGCTCCTTTCACCA  |

**Table S2. Detailed information of GASA family genes identified in *A. thaliana*, *M. domestica*, *Populus trichocarpa*, *O. sativa*, and *Prunus persica*.**

| Gene_ID      | Gene name | NCBI accession | Start | End | HMM accession | HMM name | E-Value (Pfam) |
|--------------|-----------|----------------|-------|-----|---------------|----------|----------------|
| AT1G75750.1  | AtGASA1   | NP_565116.1    | 39    | 98  | PF02704       | GASA     | 1.79E-22       |
| AT5G59845.1  | AtGASA10  | NP_568914.1    | 30    | 89  | PF02704       | GASA     | 4.51E-27       |
| AT2G18420.1  | AtGASA11  | NP_179433.2    | 35    | 94  | PF02704       | GASA     | 2.32E-23       |
| AT2G30810.1  | AtGASA12  | NP_180639.2    | 47    | 106 | PF02704       | GASA     | 4.78E-24       |
| AT3G10185.1  | AtGASA13  | A8MR46.1       | 44    | 103 | PF02704       | GASA     | 2.10E-21       |
| AT5G14920.1  | AtGASA14  | KAG7609230.1   | 215   | 275 | PF02704       | GASA     | 6.44E-26       |
| AT1G10588.1  | AtGASA15  | NP_001077503.1 | 31    | 90  | PF02704       | GASA     | 7.11E-25       |
| AT4G09610.1  | AtGASA2   | NP_192699.1    | 40    | 99  | PF02704       | GASA     | 2.49E-19       |
| AT4G09600.1  | AtGASA3   | NP_192698.1    | 40    | 99  | PF02704       | GASA     | 6.40E-26       |
| AT5G15230.1  | AtGASA4   | NP_197027.1    | 47    | 106 | PF02704       | GASA     | 5.21E-27       |
| AT3G02885.1  | AtGASA5   | NP_566186.1    | 38    | 97  | PF02704       | GASA     | 2.12E-19       |
| AT1G74670.1  | AtGASA6   | NP_177605.2    | 42    | 101 | PF02704       | GASA     | 7.49E-29       |
| AT2G14900.1  | AtGASA7   | CAD5318533.1   | 50    | 108 | PF02704       | GASA     | 1.21E-23       |
| AT2G39540.1  | AtGASA8   | NP_181486.1    | 29    | 87  | PF02704       | GASA     | 2.44E-27       |
| AT1G22690.1  | AtGASA9   | NP_001185065.1 | 60    | 119 | PF02704       | GASA     | 3.76E-26       |
| MD00G1092500 | MdGASA1   | XP_028953983.1 | 45    | 104 | PF02704       | GASA     | 3.99E-25       |
| MD09G1038100 | MdGASA10  | XP_028963601.1 | 202   | 262 | PF02704       | GASA     | 5.07E-17       |
| MD09G1038300 | MdGASA11  | XP_008379287.2 | 94    | 154 | PF02704       | GASA     | 1.53E-13       |
| MD09G1051300 | MdGASA12  | XP_018507357.2 | 49    | 108 | PF02704       | GASA     | 8.02E-20       |
| MD09G1263900 | MdGASA13  | XP_008381340.1 | 36    | 94  | PF02704       | GASA     | 1.74E-17       |
| MD13G1086500 | MdGASA14  | XP_008389581.1 | 48    | 108 | PF02704       | GASA     | 5.55E-22       |
| MD13G1285300 | MdGASA15  | XP_008367840.1 | 51    | 110 | PF02704       | GASA     | 1.96E-25       |
| MD14G1081900 | MdGASA16  | XP_008392374.1 | 57    | 116 | PF02704       | GASA     | 7.24E-31       |
| MD14G1200300 | MdGASA17  | XP_008393156.1 | 48    | 107 | PF02704       | GASA     | 4.85E-27       |
| MD15G1012300 | MdGASA18  | XP_008387949.1 | 48    | 107 | PF02704       | GASA     | 4.35E-24       |
| MD15G1012400 | MdGASA19  | XP_017191904.1 | 6     | 65  | PF02704       | GASA     | 3.63E-22       |
| MD02G1132300 | MdGASA2   | XP_028946449.1 | 47    | 106 | PF02704       | GASA     | 1.88E-23       |
| MD15G1012500 | MdGASA20  | XP_028951122.1 | 48    | 107 | PF02704       | GASA     | 1.39E-23       |
| MD15G1012600 | MdGASA21  | XP_017191904.1 | 6     | 65  | PF02704       | GASA     | 6.08E-22       |
| MD15G1073900 | MdGASA22  | XP_008360977.1 | 29    | 88  | PF02704       | GASA     | 4.24E-27       |
| MD15G1246100 | MdGASA23  | RXH75020.1     | 64    | 123 | PF02704       | GASA     | 1.18E-26       |
| MD16G1086000 | MdGASA24  | XP_008353009.1 | 47    | 107 | PF02704       | GASA     | 1.31E-23       |
| MD17G1039200 | MdGASA25  | XP_008353408.1 | 115   | 175 | PF02704       | GASA     | 1.24E-24       |
| MD17G1039400 | MdGASA26  | XP_008353409.2 | 105   | 165 | PF02704       | GASA     | 1.48E-20       |
| MD17G1041500 | MdGASA27  | XP_009341013.1 | 49    | 108 | PF02704       | GASA     | 2.05E-19       |
| MD17G1259200 | MdGASA28  | XP_008353837.1 | 36    | 94  | PF02704       | GASA     | 3.32E-17       |
| MD02G1132400 | MdGASA3   | TQD80925.1     | 47    | 106 | PF02704       | GASA     | 4.10E-24       |
| MD04G1009200 | MdGASA4   | XP_028957554.1 | 55    | 114 | PF02704       | GASA     | 2.16E-24       |

|                      |          |                |     |     |         |      |          |
|----------------------|----------|----------------|-----|-----|---------|------|----------|
| MD04G1009300         | MdGASA5  | XP_008380555.1 | 55  | 114 | PF02704 | GASA | 2.69E-24 |
| MD05G1093700         | MdGASA6  | RXH97527.1     | 30  | 88  | PF02704 | GASA | 8.46E-25 |
| MD08G1088900         | MdGASA7  | XP_028962285.1 | 29  | 88  | PF02704 | GASA | 4.63E-27 |
| MD08G1089100         | MdGASA8  | XP_028962286.1 | 29  | 88  | PF02704 | GASA | 1.73E-27 |
| MD08G1089300         | MdGASA9  | XP_008377985.1 | 29  | 88  | PF02704 | GASA | 4.48E-27 |
| LOC_Os03g14550.1     | OsGASA1  | ABF94978.1     | 42  | 101 | PF02704 | GASA | 3.75E-28 |
| LOC_Os09g24840.2     | OsGASA10 | XP_015611416.1 | 53  | 112 | PF02704 | GASA | 3.67E-29 |
| LOC_Os10g02625.1     | OsGASA11 | XP_015613996.1 | 45  | 104 | PF02704 | GASA | 6.98E-30 |
| LOC_Os03g55290.1     | OsGASA2  | XP_015629016.1 | 31  | 93  | PF02704 | GASA | 1.93E-22 |
| LOC_Os04g39110.1     | OsGASA3  | XP_015635047.1 | 45  | 105 | PF02704 | GASA | 6.85E-19 |
| LOC_Os04g39110.2     | OsGASA4  | KAF2934394.1   | 14  | 74  | PF02704 | GASA | 1.58E-19 |
| LOC_Os05g31280.1     | OsGASA5  | XP_015638982.1 | 93  | 152 | PF02704 | GASA | 1.13E-27 |
| LOC_Os05g35690.1     | OsGASA6  | XP_015638298.1 | 33  | 92  | PF02704 | GASA | 4.85E-28 |
| LOC_Os06g15620.1     | OsGASA7  | XP_015641724.1 | 51  | 110 | PF02704 | GASA | 3.59E-25 |
| LOC_Os07g40240.1     | OsGASA8  | XP_015646546.1 | 43  | 102 | PF02704 | GASA | 6.38E-14 |
| LOC_Os09g24840.1     | OsGASA9  | XP_015611416.1 | 53  | 112 | PF02704 | GASA | 3.67E-29 |
| Prupe.1G008600.1     | PpGASA1  | ONI26189.1     | 49  | 108 | PF02704 | GASA | 6.08E-25 |
| Prupe.4G257500.1     | PpGASA10 | XP_020416901.1 | 53  | 112 | PF02704 | GASA | 3.19E-30 |
| Prupe.5G178400.1     | PpGASA11 | XP_007211041.1 | 50  | 110 | PF02704 | GASA | 1.50E-26 |
| Prupe.5G193400.1     | PpGASA12 | XP_007209788.1 | 48  | 107 | PF02704 | GASA | 3.45E-27 |
| Prupe.7G049000.1     | PpGASA13 | XP_007216796.2 | 57  | 116 | PF02704 | GASA | 2.64E-30 |
| Prupe.7G168200.1     | PpGASA14 | ONH97069.1     | 97  | 156 | PF02704 | GASA | 6.02E-26 |
| Prupe.8G058200.1     | PpGASA15 | XP_007221450.2 | 54  | 113 | PF02704 | GASA | 1.60E-26 |
| Prupe.8G138400.1     | PpGASA16 | ONH91835.1     | 34  | 83  | PF02704 | GASA | 3.94E-14 |
| Prupe.8G138600.1     | PpGASA17 | XP_007200798.1 | 33  | 80  | PF02704 | GASA | 2.82E-17 |
| Prupe.1G260200.1     | PpGASA2  | ONI30584.1     | 46  | 106 | PF02704 | GASA | 2.69E-23 |
| Prupe.1G365600.1     | PpGASA3  | XP_007225927.1 | 48  | 107 | PF02704 | GASA | 5.89E-26 |
| Prupe.1G365700.1     | PpGASA4  | XP_034200285.1 | 50  | 109 | PF02704 | GASA | 4.87E-26 |
| Prupe.1G426700.1     | PpGASA5  | XP_007223838.1 | 29  | 88  | PF02704 | GASA | 5.00E-26 |
| Prupe.3G161500.1     | PpGASA6  | XP_007215190.1 | 35  | 94  | PF02704 | GASA | 4.16E-26 |
| Prupe.3G267600.1     | PpGASA7  | PQQ10068.1     | 49  | 108 | PF02704 | GASA | 3.78E-19 |
| Prupe.3G279500.1     | PpGASA8  | ONI19427.1     | 86  | 145 | PF02704 | GASA | 3.18E-12 |
| Prupe.3G279800.1     | PpGASA9  | ONI19434.1     | 150 | 210 | PF02704 | GASA | 6.44E-22 |
| Potri.001G254100.2.p | PtGASA1  | XP_002298301.3 | 54  | 113 | PF02704 | GASA | 2.75E-27 |
| Potri.006G044400.1.p | PtGASA10 | XP_011027306.1 | 57  | 116 | PF02704 | GASA | 3.06E-26 |
| Potri.007G051300.1.p | PtGASA11 | KAH8503286.1   | 43  | 102 | PF02704 | GASA | 1.97E-14 |
| Potri.009G092600.1.p | PtGASA12 | XP_002313889.2 | 30  | 89  | PF02704 | GASA | 1.32E-22 |
| Potri.012G076700.1.p | PtGASA13 | XP_002318020.1 | 49  | 109 | PF02704 | GASA | 7.10E-27 |
| Potri.013G113400.3.p | PtGASA14 | RQO99302.1     | 32  | 91  | PF02704 | GASA | 1.10E-28 |
| Potri.014G020100.1.p | PtGASA15 | XP_006374850.1 | 29  | 88  | PF02704 | GASA | 3.52E-28 |
| Potri.015G071500.1.p | PtGASA16 | XP_002321566.1 | 49  | 109 | PF02704 | GASA | 4.42E-26 |
| Potri.017G083000.1.p | PtGASA17 | AIH82562.1     | 48  | 107 | PF02704 | GASA | 5.12E-22 |
| Potri.017G124200.1.p | PtGASA18 | XP_011021371.1 | 36  | 95  | PF02704 | GASA | 9.95E-27 |

|                      |          |                |     |     |         |      |          |
|----------------------|----------|----------------|-----|-----|---------|------|----------|
| Potri.019G083900.1.p | PtGASA19 | XP_002325557.2 | 51  | 110 | PF02704 | GASA | 3.85E-24 |
| Potri.001G297700.1.p | PtGASA2  | KAG6793118.1   | 29  | 88  | PF02704 | GASA | 1.63E-22 |
| Potri.001G315500.1.p | PtGASA3  | PNT57691.1     | 37  | 96  | PF02704 | GASA | 2.23E-28 |
| Potri.001G350600.3.p | PtGASA4  | XP_011047278.1 | 185 | 245 | PF02704 | GASA | 4.65E-23 |
| Potri.002G022500.1.p | PtGASA5  | XP_002300706.2 | 59  | 118 | PF02704 | GASA | 2.20E-29 |
| Potri.002G022600.2.p | PtGASA6  | XP_002300707.1 | 43  | 102 | PF02704 | GASA | 1.29E-24 |
| Potri.002G022700.1.p | PtGASA7  | XP_002300708.2 | 42  | 101 | PF02704 | GASA | 1.38E-23 |
| Potri.005G239000.2.p | PtGASA8  | XP_002307719.1 | 39  | 98  | PF02704 | GASA | 1.08E-29 |
| Potri.005G239100.2.p | PtGASA9  | KAH8509589.1   | 43  | 102 | PF02704 | GASA | 1.31E-27 |

**Table S3. Detailed information of GASA family genes identified in *A. thaliana*, *M. domestica*, *Populus trichocarpa*, *O. sativa*, and *Prunus persica*.**

| Gene_name | Duplication mode |
|-----------|------------------|
| AtGASA1   | tandem           |
| AtGASA10  | dispersed        |
| AtGASA11  | dispersed        |
| AtGASA12  | dispersed        |
| AtGASA13  | dispersed        |
| AtGASA14  | tandem           |
| AtGASA15  | tandem           |
| AtGASA2   | WGD or Segmental |
| AtGASA3   | tandem           |
| AtGASA4   | tandem           |
| AtGASA5   | dispersed        |
| AtGASA6   | dispersed        |
| AtGASA7   | dispersed        |
| AtGASA8   | dispersed        |
| AtGASA9   | tandem           |
| MdGASA1   | tandem           |
| MdGASA10  | WGD or Segmental |
| MdGASA11  | dispersed        |
| MdGASA12  | WGD or Segmental |
| MdGASA13  | WGD or Segmental |
| MdGASA14  | WGD or Segmental |
| MdGASA15  | WGD or Segmental |
| MdGASA16  | dispersed        |
| MdGASA17  | WGD or Segmental |
| MdGASA18  | WGD or Segmental |
| MdGASA19  | tandem           |
| MdGASA2   | WGD or Segmental |



|          |                  |
|----------|------------------|
| MdGASA20 | WGD or Segmental |
| MdGASA21 | tandem           |
| MdGASA22 | WGD or Segmental |
| MdGASA23 | WGD or Segmental |
| MdGASA24 | WGD or Segmental |
| MdGASA25 | WGD or Segmental |
| MdGASA26 | proximal         |
| MdGASA27 | dispersed        |
| MdGASA28 | WGD or Segmental |
| MdGASA3  | WGD or Segmental |
| MdGASA4  | WGD or Segmental |
| MdGASA5  | tandem           |
| MdGASA6  | WGD or Segmental |
| MdGASA7  | WGD or Segmental |
| MdGASA8  | tandem           |
| MdGASA9  | proximal         |
| OsGASA1  | Dispersed        |
| OsGASA11 | Dispersed        |
| OsGASA2  | Dispersed        |
| OsGASA3  | Dispersed        |
| OsGASA5  | Dispersed        |
| OsGASA6  | Dispersed        |
| OsGASA7  | Dispersed        |
| OsGASA8  | Singleton        |
| OsGASA9  | Dispersed        |
| PmGASA1  | WGD or Segmental |
| PmGASA10 | dispersed        |
| PmGASA11 | WGD or Segmental |
| PmGASA12 | WGD or Segmental |
| PmGASA13 | dispersed        |
| PmGASA14 | WGD or Segmental |
| PmGASA15 | dispersed        |
| PmGASA16 | dispersed        |
| PmGASA2  | WGD or Segmental |
| PmGASA3  | tandem           |
| PmGASA4  | tandem           |
| PmGASA5  | dispersed        |
| PmGASA6  | WGD or Segmental |
| PmGASA7  | WGD or Segmental |
| PmGASA8  | WGD or Segmental |
| PmGASA9  | WGD or Segmental |
| PpGASA1  | dispersed        |
| PpGASA10 | dispersed        |

|          |                  |
|----------|------------------|
| PpGASA11 | WGD or Segmental |
| PpGASA12 | WGD or Segmental |
| PpGASA13 | dispersed        |
| PpGASA14 | WGD or Segmental |
| PpGASA15 | dispersed        |
| PpGASA16 | WGD or Segmental |
| PpGASA17 | proximal         |
| PpGASA2  | WGD or Segmental |
| PpGASA3  | WGD or Segmental |
| PpGASA4  | tandem           |
| PpGASA5  | WGD or Segmental |
| PpGASA6  | tandem           |
| PpGASA7  | WGD or Segmental |
| PpGASA8  | WGD or Segmental |
| PpGASA9  | WGD or Segmental |
| PtGASA1  | Dispersed        |
| PtGASA10 | WGD or Segmental |
| PtGASA11 | WGD or Segmental |
| PtGASA12 | WGD or Segmental |
| PtGASA13 | Dispersed        |
| PtGASA14 | WGD or Segmental |
| PtGASA15 | Dispersed        |
| PtGASA16 | Dispersed        |
| PtGASA17 | WGD or Segmental |
| PtGASA18 | Dispersed        |
| PtGASA19 | WGD or Segmental |
| PtGASA2  | WGD or Segmental |
| PtGASA3  | Dispersed        |
| PtGASA4  | WGD or Segmental |
| PtGASA5  | WGD or Segmental |
| PtGASA6  | Dispersed        |
| PtGASA7  | Dispersed        |
| PtGASA8  | WGD or Segmental |
| PtGASA9  | Dispersed        |

**Table S4. The cis-regulatory elements identified for *PmGASA* genes and their detailed information.**

| Gene    | Site Name  | Organism             | Position | Strand | Sequence   | Function                                                        |
|---------|------------|----------------------|----------|--------|------------|-----------------------------------------------------------------|
| PmGASA1 | ABRE       | Hordeum vulgare      | 93       | -      | CGTACGTGCA | cis-acting element involved in the abscisic acid responsiveness |
| PmGASA1 | ABRE       | Arabidopsis thaliana | 135      | -      | ACGTG      | cis-acting element involved in the abscisic acid responsiveness |
| PmGASA1 | ABRE       | Arabidopsis thaliana | 95       | -      | ACGTG      | cis-acting element involved in the abscisic acid responsiveness |
| PmGASA1 | ABRE       | Arabidopsis thaliana | 847      | +      | ACGTG      | cis-acting element involved in the abscisic acid responsiveness |
| PmGASA1 | AuxRR-core | Nicotiana tabacum    | 817      | -      | GGTCCAT    | cis-acting regulatory element involved in auxin responsiveness  |
| PmGASA1 | G-box      | Pisum sativum        | 135      | +      | CACGTT     | cis-acting regulatory element involved in light responsiveness  |
| PmGASA1 | G-box      | Pisum sativum        | 846      | -      | CACGTT     | cis-acting regulatory element involved in light responsiveness  |
| PmGASA1 | G-box      | Arabidopsis thaliana | 95       | -      | TACGTG     | cis-acting regulatory element involved in light responsiveness  |
| PmGASA1 | LTR        | Hordeum vulgare      | 85       | +      | CCGAAA     | cis-acting element involved in low-temperature responsiveness   |
| PmGASA1 | LTR        | Hordeum vulgare      | 1143     | +      | CCGAAA     | cis-acting element involved in low-temperature responsiveness   |
| PmGASA1 | MBS        | Arabidopsis thaliana | 174      | +      | CAACTG     | MYB binding site involved in drought-inducibility               |
| PmGASA1 | MBS        | Arabidopsis thaliana | 1520     | +      | CAACTG     | MYB binding site involved in drought-inducibility               |

|         |             |                         |      |   |            |                                                                   |
|---------|-------------|-------------------------|------|---|------------|-------------------------------------------------------------------|
| PmGASA1 | TATC-box    | Oryza sativa            | 270  | + | TATCCCA    | cis-acting element involved in gibberellin-responsiveness         |
| PmGASA1 | TCA-element | Brassica oleracea       | 741  | + | TCAGAAGAGG | cis-acting element involved in salicylic acid responsiveness      |
| PmGASA1 | TGA-element | Brassica oleracea       | 212  | - | AACGAC     | auxin-responsive element                                          |
| PmGASA1 | circadian   | Lycopersicon esculentum | 497  | - | CAAAGATATC | cis-acting regulatory element involved in circadian control       |
| PmGASA2 | ABRE        | Hordeum vulgare         | 690  | + | CGCACGTGTC | cis-acting element involved in the abscisic acid responsiveness   |
| PmGASA2 | ACE         | Petroselinum crispum    | 1402 | - | CTAACGTATT | cis-acting element involved in light responsiveness               |
| PmGASA2 | CGTCA-motif | Hordeum vulgare         | 482  | - | CGTCA      | cis-acting regulatory element involved in the MeJA-responsiveness |
| PmGASA2 | CGTCA-motif | Hordeum vulgare         | 282  | - | CGTCA      | cis-acting regulatory element involved in the MeJA-responsiveness |
| PmGASA2 | CGTCA-motif | Hordeum vulgare         | 1100 | - | CGTCA      | cis-acting regulatory element involved in the MeJA-responsiveness |
| PmGASA2 | G-box       | Brassica oleracea       | 1559 | + | TAACACGTAG | cis-acting regulatory element involved in light responsiveness    |
| PmGASA2 | GARE-motif  | Brassica oleracea       | 1027 | + | TCTGTTG    | gibberellin-responsive element                                    |
| PmGASA2 | LTR         | Hordeum vulgare         | 1283 | + | CCGAAA     | cis-acting element involved in low-temperature responsiveness     |
| PmGASA2 | MRE         | Petroselinum crispum    | 152  | - | AACCTAA    | MYB binding site involved in light responsiveness                 |

|         |             |                      |      |   |            |                                                                   |
|---------|-------------|----------------------|------|---|------------|-------------------------------------------------------------------|
| PmGASA2 | TGA-element | Brassica oleracea    | 1033 | - | AACGAC     | auxin-responsive element                                          |
| PmGASA2 | TGA-element | Brassica oleracea    | 550  | - | AACGAC     | auxin-responsive element                                          |
| PmGASA2 | TGA-element | Brassica oleracea    | 253  | - | AACGAC     | auxin-responsive element                                          |
| PmGASA2 | TGACG-motif | Hordeum vulgare      | 1100 | + | TGACG      | cis-acting regulatory element involved in the MeJA-responsiveness |
| PmGASA2 | TGACG-motif | Hordeum vulgare      | 282  | + | TGACG      | cis-acting regulatory element involved in the MeJA-responsiveness |
| PmGASA2 | TGACG-motif | Hordeum vulgare      | 482  | + | TGACG      | cis-acting regulatory element involved in the MeJA-responsiveness |
| PmGASA3 | ABRE        | Arabidopsis thaliana | 1222 | - | ACGTG      | cis-acting element involved in the abscisic acid responsiveness   |
| PmGASA3 | ABRE        | Arabidopsis thaliana | 981  | - | ACGTG      | cis-acting element involved in the abscisic acid responsiveness   |
| PmGASA3 | ABRE        | Oryza sativa         | 1220 | - | TACGTGTC   | cis-acting element involved in the abscisic acid responsiveness   |
| PmGASA3 | ACE         | Petroselinum crispum | 1220 | + | GACACGTATG | cis-acting element involved in light responsiveness               |
| PmGASA3 | G-box       | Arabidopsis thaliana | 981  | - | TACGTG     | cis-acting regulatory element involved in light responsiveness    |
| PmGASA3 | G-box       | Arabidopsis thaliana | 1222 | - | TACGTG     | cis-acting regulatory element involved in light responsiveness    |
| PmGASA3 | G-box       | Zea mays             | 1982 | + | CACGAC     | cis-acting regulatory element involved in light responsiveness    |

|         |             |                         |      |   |            |                                                                   |
|---------|-------------|-------------------------|------|---|------------|-------------------------------------------------------------------|
| PmGASA3 | GARE-motif  | Brassica oleracea       | 1989 | - | TCTGTTG    | gibberellin-responsive element                                    |
| PmGASA3 | LTR         | Hordeum vulgare         | 1215 | - | CCGAAA     | cis-acting element involved in low-temperature responsiveness     |
| PmGASA3 | MRE         | Petroselinum crispum    | 660  | + | AACCTAA    | MYB binding site involved in light responsiveness                 |
| PmGASA3 | TCA-element | Nicotiana tabacum       | 1586 | + | CCATCTTTTT | cis-acting element involved in salicylic acid responsiveness      |
| PmGASA3 | circadian   | Lycopersicon esculentum | 1512 | - | CAAAGATATC | cis-acting regulatory element involved in circadian control       |
| PmGASA3 | circadian   | Lycopersicon esculentum | 1200 | - | CAAAGATATC | cis-acting regulatory element involved in circadian control       |
| PmGASA4 | ABRE        | Arabidopsis thaliana    | 1717 | - | ACGTG      | cis-acting element involved in the abscisic acid responsiveness   |
| PmGASA4 | ABRE        | Oryza sativa            | 1715 | - | TACGTGTC   | cis-acting element involved in the abscisic acid responsiveness   |
| PmGASA4 | ABRE        | Arabidopsis thaliana    | 136  | + | ACGTG      | cis-acting element involved in the abscisic acid responsiveness   |
| PmGASA4 | ABRE        | Hordeum vulgare         | 159  | + | CGTACGTGCA | cis-acting element involved in the abscisic acid responsiveness   |
| PmGASA4 | ACE         | Petroselinum crispum    | 1715 | + | GACACGTATG | cis-acting element involved in light responsiveness               |
| PmGASA4 | CGTCA-motif | Hordeum vulgare         | 1563 | - | CGTCA      | cis-acting regulatory element involved in the MeJA-responsiveness |
| PmGASA4 | G-box       | Arabidopsis thaliana    | 135  | + | TACGTG     | cis-acting regulatory element involved in light responsiveness    |

|         |             |                      |      |   |            |                                                                   |
|---------|-------------|----------------------|------|---|------------|-------------------------------------------------------------------|
| PmGASA4 | G-box       | Arabidopsis thaliana | 1717 | - | TACGTG     | cis-acting regulatory element involved in light responsiveness    |
| PmGASA4 | TCA-element | Nicotiana tabacum    | 1332 | + | CCATCTTTTT | cis-acting element involved in salicylic acid responsiveness      |
| PmGASA4 | TCA-element | Nicotiana tabacum    | 450  | + | CCATCTTTTT | cis-acting element involved in salicylic acid responsiveness      |
| PmGASA4 | TGACG-motif | Hordeum vulgare      | 1563 | + | TGACG      | cis-acting regulatory element involved in the MeJA-responsiveness |
| PmGASA5 | ABRE        | Arabidopsis thaliana | 395  | - | ACGTG      | cis-acting element involved in the abscisic acid responsiveness   |
| PmGASA5 | ABRE        | Arabidopsis thaliana | 294  | + | ACGTG      | cis-acting element involved in the abscisic acid responsiveness   |
| PmGASA5 | CGTCA-motif | Hordeum vulgare      | 1105 | - | CGTCA      | cis-acting regulatory element involved in the MeJA-responsiveness |
| PmGASA5 | G-box       | Pisum sativum        | 293  | - | CACGTT     | cis-acting regulatory element involved in light responsiveness    |
| PmGASA5 | G-box       | Pisum sativum        | 395  | + | CACGTT     | cis-acting regulatory element involved in light responsiveness    |
| PmGASA5 | GT1-motif   | Arabidopsis thaliana | 399  | - | GGTTAA     | light responsive element                                          |
| PmGASA5 | LTR         | Hordeum vulgare      | 23   | - | CCGAAA     | cis-acting element involved in low-temperature responsiveness     |
| PmGASA5 | LTR         | Hordeum vulgare      | 510  | + | CCGAAA     | cis-acting element involved in low-temperature responsiveness     |
| PmGASA5 | LTR         | Hordeum vulgare      | 1493 | + | CCGAAA     | cis-acting element involved in low-temperature responsiveness     |
| PmGASA5 | MBS         | Arabidopsis thaliana | 419  | - | CAACTG     | MYB binding site involved in drought-inducibility                 |

|         |             |                         |      |   |              |                                                                      |
|---------|-------------|-------------------------|------|---|--------------|----------------------------------------------------------------------|
| PmGASA5 | MBS         | Arabidopsis thaliana    | 1806 | - | CAACTG       | MYB binding site involved in drought-inducibility                    |
| PmGASA5 | MBSI        | Petunia hybrida         | 1490 | - | TTTTTACGGTTA | MYB binding site involved in flavonoid biosynthetic genes regulation |
| PmGASA5 | P-box       | Oryza sativa            | 1260 | - | CCTTTTG      | gibberellin-responsive element                                       |
| PmGASA5 | TCA-element | Nicotiana tabacum       | 1502 | - | CCATCTTTTT   | cis-acting element involved in salicylic acid responsiveness         |
| PmGASA5 | TGACG-motif | Hordeum vulgare         | 1105 | + | TGACG        | cis-acting regulatory element involved in the MeJA-responsiveness    |
| PmGASA5 | circadian   | Lycopersicon esculentum | 264  | - | CAAAGATATC   | cis-acting regulatory element involved in circadian control          |
| PmGASA6 | ABRE        | Arabidopsis thaliana    | 1554 | - | ACGTG        | cis-acting element involved in the abscisic acid responsiveness      |
| PmGASA6 | ABRE        | Arabidopsis thaliana    | 492  | - | ACGTG        | cis-acting element involved in the abscisic acid responsiveness      |
| PmGASA6 | AuxRR-core  | Nicotiana tabacum       | 636  | + | GGTCCAT      | cis-acting regulatory element involved in auxin responsiveness       |
| PmGASA6 | CGTCA-motif | Hordeum vulgare         | 1464 | - | CGTCA        | cis-acting regulatory element involved in the MeJA-responsiveness    |
| PmGASA6 | CGTCA-motif | Hordeum vulgare         | 1970 | + | CGTCA        | cis-acting regulatory element involved in the MeJA-responsiveness    |
| PmGASA6 | G-box       | Pisum sativum           | 492  | + | CACGTT       | cis-acting regulatory element involved in light responsiveness       |
| PmGASA6 | G-box       | Arabidopsis thaliana    | 1554 | - | TACGTG       | cis-acting regulatory element involved in light responsiveness       |
| PmGASA6 | GT1-motif   | Avena sativa            | 996  | - | GGTTAAT      | light responsive element                                             |
| PmGASA6 | GT1-motif   | Arabidopsis thaliana    | 997  | - | GGTTAA       | light responsive element                                             |



|         |             |                      |      |   |                 |                                                                   |
|---------|-------------|----------------------|------|---|-----------------|-------------------------------------------------------------------|
| PmGASA6 | MBS         | Arabidopsis thaliana | 767  | - | CAACTG          | MYB binding site involved in drought-inducibility                 |
| PmGASA6 | TGACG-motif | Hordeum vulgare      | 1464 | + | TGACG           | cis-acting regulatory element involved in the MeJA-responsiveness |
| PmGASA6 | TGACG-motif | Hordeum vulgare      | 1970 | - | TGACG           | cis-acting regulatory element involved in the MeJA-responsiveness |
| PmGASA7 | ABRE        | Hordeum vulgare      | 1763 | + | CGCACGTGTC      | cis-acting element involved in the abscisic acid responsiveness   |
| PmGASA7 | ABRE        | Arabidopsis thaliana | 1754 | + | ACGTG           | cis-acting element involved in the abscisic acid responsiveness   |
| PmGASA7 | ABRE        | Arabidopsis thaliana | 1765 | - | CACGTG          | cis-acting element involved in the abscisic acid responsiveness   |
| PmGASA7 | ABRE        | Arabidopsis thaliana | 1766 | + | ACGTG           | cis-acting element involved in the abscisic acid responsiveness   |
| PmGASA7 | ACE         | Petroselinum crispum | 1763 | - | GACACGTATG      | cis-acting element involved in light responsiveness               |
| PmGASA7 | G-box       | Pisum sativum        | 1765 | - | CACGTG          | cis-acting regulatory element involved in light responsiveness    |
| PmGASA7 | G-box       | Pisum sativum        | 1753 | - | CACGTT          | cis-acting regulatory element involved in light responsiveness    |
| PmGASA7 | G-box       | Brassica napus       | 1764 | - | ACACGTGT        | cis-acting regulatory element involved in light responsiveness    |
| PmGASA7 | G-box       | Arabidopsis thaliana | 1765 | - | CACGTG          | cis-acting regulatory element involved in light responsiveness    |
| PmGASA7 | HD-Zip 3    | Arabidopsis thaliana | 1558 | - | GTAAT(G/C)ATTAC | protein binding site                                              |
| PmGASA7 | LTR         | Hordeum vulgare      | 850  | - | CCGAAA          | cis-acting element involved in low-temperature responsiveness     |

|         |             |                         |      |   |            |                                                                   |
|---------|-------------|-------------------------|------|---|------------|-------------------------------------------------------------------|
| PmGASA7 | LTR         | Hordeum vulgare         | 1175 | + | CCGAAA     | cis-acting element involved in low-temperature responsiveness     |
| PmGASA7 | TGA-element | Brassica oleracea       | 443  | + | AACGAC     | auxin-responsive element                                          |
| PmGASA7 | circadian   | Lycopersicon esculentum | 1546 | - | CAAAGATATC | cis-acting regulatory element involved in circadian control       |
| PmGASA8 | ABRE        | Arabidopsis thaliana    | 1556 | - | ACGTG      | cis-acting element involved in the abscisic acid responsiveness   |
| PmGASA8 | CGTCA-motif | Hordeum vulgare         | 478  | - | CGTCA      | cis-acting regulatory element involved in the MeJA-responsiveness |
| PmGASA8 | CGTCA-motif | Hordeum vulgare         | 1878 | - | CGTCA      | cis-acting regulatory element involved in the MeJA-responsiveness |
| PmGASA8 | CGTCA-motif | Hordeum vulgare         | 2    | + | CGTCA      | cis-acting regulatory element involved in the MeJA-responsiveness |
| PmGASA8 | CGTCA-motif | Hordeum vulgare         | 55   | + | CGTCA      | cis-acting regulatory element involved in the MeJA-responsiveness |
| PmGASA8 | G-box       | Zea mays                | 1211 | - | CACGAC     | cis-acting regulatory element involved in light responsiveness    |
| PmGASA8 | G-box       | Arabidopsis thaliana    | 1556 | - | TACGTG     | cis-acting regulatory element involved in light responsiveness    |
| PmGASA8 | GARE-motif  | Brassica oleracea       | 500  | + | TCTGTTG    | gibberellin-responsive element                                    |
| PmGASA8 | GT1-motif   | Arabidopsis thaliana    | 1033 | - | GGTTAA     | light responsive element                                          |
| PmGASA8 | GT1-motif   | Arabidopsis thaliana    | 999  | - | GGTTAA     | light responsive element                                          |
| PmGASA8 | GT1-motif   | Arabidopsis thaliana    | 1763 | - | GGTTAA     | light responsive element                                          |
| PmGASA8 | MBS         | Arabidopsis thaliana    | 1548 | + | CAACTG     | MYB binding site involved in drought-inducibility                 |

|         |                 |                      |      |   |            |                                                                   |
|---------|-----------------|----------------------|------|---|------------|-------------------------------------------------------------------|
| PmGASA8 | MBS             | Arabidopsis thaliana | 1872 | + | CAACTG     | MYB binding site involved in drought-inducibility                 |
| PmGASA8 | MBS             | Arabidopsis thaliana | 1509 | - | CAACTG     | MYB binding site involved in drought-inducibility                 |
| PmGASA8 | TC-rich repeats | Nicotiana tabacum    | 1615 | + | GTTTTCTTAC | cis-acting element involved in defense and stress responsiveness  |
| PmGASA8 | TC-rich repeats | Nicotiana tabacum    | 1568 | + | ATTCTCTAAC | cis-acting element involved in defense and stress responsiveness  |
| PmGASA8 | TGACG-motif     | Hordeum vulgare      | 478  | + | TGACG      | cis-acting regulatory element involved in the MeJA-responsiveness |
| PmGASA8 | TGACG-motif     | Hordeum vulgare      | 55   | - | TGACG      | cis-acting regulatory element involved in the MeJA-responsiveness |
| PmGASA8 | TGACG-motif     | Hordeum vulgare      | 1878 | + | TGACG      | cis-acting regulatory element involved in the MeJA-responsiveness |
| PmGASA8 | TGACG-motif     | Hordeum vulgare      | 2    | - | TGACG      | cis-acting regulatory element involved in the MeJA-responsiveness |
| PmGASA9 | ABRE            | Arabidopsis thaliana | 594  | + | ACGTG      | cis-acting element involved in the abscisic acid responsiveness   |
| PmGASA9 | CGTCA-motif     | Hordeum vulgare      | 246  | - | CGTCA      | cis-acting regulatory element involved in the MeJA-responsiveness |
| PmGASA9 | G-box           | Arabidopsis thaliana | 593  | + | TACGTG     | cis-acting regulatory element involved in light responsiveness    |
| PmGASA9 | GT1-motif       | Arabidopsis thaliana | 814  | - | GGTTAA     | light responsive element                                          |
| PmGASA9 | GT1-motif       | Arabidopsis thaliana | 848  | - | GGTTAA     | light responsive element                                          |
| PmGASA9 | GT1-motif       | Avena sativa         | 630  | + | GGTTAAT    | light responsive element                                          |
| PmGASA9 | LTR             | Hordeum vulgare      | 430  | - | CCGAAA     | cis-acting element involved in low-temperature responsiveness     |
| PmGASA9 | MBS             | Arabidopsis thaliana | 1873 | + | CAACTG     | MYB binding site involved in drought-inducibility                 |

|          |             |                      |      |   |            |                                                                   |
|----------|-------------|----------------------|------|---|------------|-------------------------------------------------------------------|
| PmGASA9  | MBS         | Arabidopsis thaliana | 1394 | + | CAACTG     | MYB binding site involved in drought-inducibility                 |
| PmGASA9  | MBS         | Arabidopsis thaliana | 341  | - | CAACTG     | MYB binding site involved in drought-inducibility                 |
| PmGASA9  | MBS         | Arabidopsis thaliana | 739  | - | CAACTG     | MYB binding site involved in drought-inducibility                 |
| PmGASA9  | TATC-box    | Oryza sativa         | 1668 | - | TATCCCA    | cis-acting element involved in gibberellin-responsiveness         |
| PmGASA9  | TCA-element | Nicotiana tabacum    | 1661 | - | CCATCTTTTT | cis-acting element involved in salicylic acid responsiveness      |
| PmGASA9  | TGACG-motif | Hordeum vulgare      | 246  | + | TGACG      | cis-acting regulatory element involved in the MeJA-responsiveness |
| PmGASA10 | ABRE        | Arabidopsis thaliana | 1488 | + | ACGTG      | cis-acting element involved in the abscisic acid responsiveness   |
| PmGASA10 | ABRE        | Arabidopsis thaliana | 855  | - | ACGTG      | cis-acting element involved in the abscisic acid responsiveness   |
| PmGASA10 | ABRE        | Arabidopsis thaliana | 653  | - | ACGTG      | cis-acting element involved in the abscisic acid responsiveness   |
| PmGASA10 | ABRE        | Arabidopsis thaliana | 561  | + | ACGTG      | cis-acting element involved in the abscisic acid responsiveness   |
| PmGASA10 | AuxRR-core  | Nicotiana tabacum    | 445  | + | GGTCCAT    | cis-acting regulatory element involved in auxin responsiveness    |
| PmGASA10 | CGTCA-motif | Hordeum vulgare      | 857  | + | CGTCA      | cis-acting regulatory element involved in the MeJA-responsiveness |
| PmGASA10 | CGTCA-motif | Hordeum vulgare      | 1159 | - | CGTCA      | cis-acting regulatory element involved in the MeJA-responsiveness |
| PmGASA10 | G-box       | Arabidopsis thaliana | 653  | - | TACGTG     | cis-acting regulatory element involved in light responsiveness    |

|          |             |                      |      |   |            |                                                                   |
|----------|-------------|----------------------|------|---|------------|-------------------------------------------------------------------|
| PmGASA10 | G-box       | Arabidopsis thaliana | 560  | + | TACGTG     | cis-acting regulatory element involved in light responsiveness    |
| PmGASA10 | G-box       | Zea mays             | 855  | + | CACGTC     | cis-acting regulatory element involved in light responsiveness    |
| PmGASA10 | G-box       | Arabidopsis thaliana | 1487 | + | TACGTG     | cis-acting regulatory element involved in light responsiveness    |
| PmGASA10 | GT1-motif   | Arabidopsis thaliana | 1916 | - | GGTTAA     | light responsive element                                          |
| PmGASA10 | MBS         | Arabidopsis thaliana | 1826 | + | CAACTG     | MYB binding site involved in drought-inducibility                 |
| PmGASA10 | MRE         | Petroselinum crispum | 888  | - | AACCTAA    | MYB binding site involved in light responsiveness                 |
| PmGASA10 | MRE         | Petroselinum crispum | 1255 | + | AACCTAA    | MYB binding site involved in light responsiveness                 |
| PmGASA10 | TCA-element | Nicotiana tabacum    | 265  | + | CCATCTTTTT | cis-acting element involved in salicylic acid responsiveness      |
| PmGASA10 | TCA-element | Nicotiana tabacum    | 1753 | - | CCATCTTTTT | cis-acting element involved in salicylic acid responsiveness      |
| PmGASA10 | TCA-element | Nicotiana tabacum    | 1771 | - | CCATCTTTTT | cis-acting element involved in salicylic acid responsiveness      |
| PmGASA10 | TCA-element | Nicotiana tabacum    | 1114 | - | CCATCTTTTT | cis-acting element involved in salicylic acid responsiveness      |
| PmGASA10 | TGA-element | Brassica oleracea    | 1134 | + | AACGAC     | auxin-responsive element                                          |
| PmGASA10 | TGACG-motif | Hordeum vulgare      | 1159 | + | TGACG      | cis-acting regulatory element involved in the MeJA-responsiveness |
| PmGASA10 | TGACG-motif | Hordeum vulgare      | 857  | - | TGACG      | cis-acting regulatory element involved in the MeJA-responsiveness |

|          |                 |                      |      |   |            |                                                                  |
|----------|-----------------|----------------------|------|---|------------|------------------------------------------------------------------|
| PmGASA11 | ABRE            | Arabidopsis thaliana | 1574 | + | ACGTG      | cis-acting element involved in the abscisic acid responsiveness  |
| PmGASA11 | ABRE            | Arabidopsis thaliana | 1573 | - | CACGTG     | cis-acting element involved in the abscisic acid responsiveness  |
| PmGASA11 | ABRE            | Hordeum vulgare      | 1571 | - | GCAACGTGTC | cis-acting element involved in the abscisic acid responsiveness  |
| PmGASA11 | G-box           | Pisum sativum        | 1573 | - | CACGTG     | cis-acting regulatory element involved in light responsiveness   |
| PmGASA11 | G-box           | Brassica napus       | 1572 | + | ACACGTGGC  | cis-acting regulatory element involved in light responsiveness   |
| PmGASA11 | G-box           | Zea mays             | 549  | + | CACGAC     | cis-acting regulatory element involved in light responsiveness   |
| PmGASA11 | G-box           | Arabidopsis thaliana | 1573 | - | CACGTG     | cis-acting regulatory element involved in light responsiveness   |
| PmGASA11 | MBS             | Arabidopsis thaliana | 289  | + | CAACTG     | MYB binding site involved in drought-inducibility                |
| PmGASA11 | MBS             | Arabidopsis thaliana | 80   | - | CAACTG     | MYB binding site involved in drought-inducibility                |
| PmGASA11 | MBS             | Arabidopsis thaliana | 320  | - | CAACTG     | MYB binding site involved in drought-inducibility                |
| PmGASA11 | MRE             | Petroselinum crispum | 1641 | + | AACCTAA    | MYB binding site involved in light responsiveness                |
| PmGASA11 | P-box           | Oryza sativa         | 1558 | - | CCTTTTG    | gibberellin-responsive element                                   |
| PmGASA11 | TC-rich repeats | Nicotiana tabacum    | 792  | + | ATTCTCTAAC | cis-acting element involved in defense and stress responsiveness |
| PmGASA11 | TGA-element     | Brassica oleracea    | 1213 | - | AACGAC     | auxin-responsive element                                         |
| PmGASA12 | ABRE            | Arabidopsis thaliana | 1589 | - | ACGTG      | cis-acting element involved in the abscisic acid responsiveness  |

|          |             |                         |      |   |            |                                                                   |
|----------|-------------|-------------------------|------|---|------------|-------------------------------------------------------------------|
| PmGASA12 | CGTCA-motif | Hordeum vulgare         | 1591 | + | CGTCA      | cis-acting regulatory element involved in the MeJA-responsiveness |
| PmGASA12 | CGTCA-motif | Hordeum vulgare         | 734  | + | CGTCA      | cis-acting regulatory element involved in the MeJA-responsiveness |
| PmGASA12 | G-box       | Zea mays                | 1589 | + | CACGTC     | cis-acting regulatory element involved in light responsiveness    |
| PmGASA12 | MBS         | Arabidopsis thaliana    | 1651 | - | CAACTG     | MYB binding site involved in drought-inducibility                 |
| PmGASA12 | MRE         | Petroselinum crispum    | 1508 | - | AACCTAA    | MYB binding site involved in light responsiveness                 |
| PmGASA12 | TGA-element | Brassica oleracea       | 1360 | - | AACGAC     | auxin-responsive element                                          |
| PmGASA12 | TGA-element | Brassica oleracea       | 41   | - | AACGAC     | auxin-responsive element                                          |
| PmGASA12 | TGACG-motif | Hordeum vulgare         | 1591 | - | TGACG      | cis-acting regulatory element involved in the MeJA-responsiveness |
| PmGASA12 | TGACG-motif | Hordeum vulgare         | 734  | - | TGACG      | cis-acting regulatory element involved in the MeJA-responsiveness |
| PmGASA12 | circadian   | Lycopersicon esculentum | 631  | + | CAAAGATATC | cis-acting regulatory element involved in circadian control       |
| PmGASA12 | circadian   | Lycopersicon esculentum | 1905 | + | CAAAGATATC | cis-acting regulatory element involved in circadian control       |
| PmGASA13 | GT1-motif   | Arabidopsis thaliana    | 1853 | - | GGTTAA     | light responsive element                                          |
| PmGASA13 | GT1-motif   | Arabidopsis thaliana    | 1401 | - | GGTTAA     | light responsive element                                          |
| PmGASA13 | GT1-motif   | Avena sativa            | 511  | + | GGTTAAT    | light responsive element                                          |
| PmGASA13 | LTR         | Hordeum vulgare         | 729  | + | CCGAAA     | cis-acting element involved in low-temperature responsiveness     |

|          |                 |                         |      |   |                 |                                                                   |
|----------|-----------------|-------------------------|------|---|-----------------|-------------------------------------------------------------------|
| PmGASA13 | MBS             | Arabidopsis thaliana    | 889  | + | CAACTG          | MYB binding site involved in drought-inducibility                 |
| PmGASA13 | MBS             | Arabidopsis thaliana    | 769  | + | CAACTG          | MYB binding site involved in drought-inducibility                 |
| PmGASA13 | P-box           | Oryza sativa            | 439  | + | CCTTTTG         | gibberellin-responsive element                                    |
| PmGASA13 | TATC-box        | Oryza sativa            | 1262 | + | TATCCCA         | cis-acting element involved in gibberellin-responsiveness         |
| PmGASA13 | TC-rich repeats | Nicotiana tabacum       | 1671 | + | ATTCTCTAAC      | cis-acting element involved in defense and stress responsiveness  |
| PmGASA13 | TC-rich repeats | Nicotiana tabacum       | 1815 | + | ATTCTCTAAC      | cis-acting element involved in defense and stress responsiveness  |
| PmGASA13 | TGA-element     | Brassica oleracea       | 846  | + | AACGAC          | auxin-responsive element                                          |
| PmGASA13 | circadian       | Lycopersicon esculentum | 484  | - | CAAAGATATC      | cis-acting regulatory element involved in circadian control       |
| PmGASA14 | AuxRE           | Glycine max             | 99   | + | TGTCTCAATAAG    | part of an auxin-responsive element                               |
| PmGASA14 | CGTCA-motif     | Hordeum vulgare         | 21   | - | CGTCA           | cis-acting regulatory element involved in the MeJA-responsiveness |
| PmGASA14 | CGTCA-motif     | Hordeum vulgare         | 1071 | - | CGTCA           | cis-acting regulatory element involved in the MeJA-responsiveness |
| PmGASA14 | HD-Zip 3        | Arabidopsis thaliana    | 1130 | - | GTAAT(G/C)ATTAC | protein binding site                                              |
| PmGASA14 | TCA-element     | Nicotiana tabacum       | 424  | - | CCATCTTTTT      | cis-acting element involved in salicylic acid responsiveness      |
| PmGASA14 | TGA-element     | Brassica oleracea       | 1219 | + | AACGAC          | auxin-responsive element                                          |
| PmGASA14 | TGACG-motif     | Hordeum vulgare         | 21   | + | TGACG           | cis-acting regulatory element involved in the MeJA-responsiveness |



|          |             |                      |      |   |            |                                                                   |
|----------|-------------|----------------------|------|---|------------|-------------------------------------------------------------------|
| PmGASA14 | TGACG-motif | Hordeum vulgare      | 1071 | + | TGACG      | cis-acting regulatory element involved in the MeJA-responsiveness |
| PmGASA15 | ABRE        | Arabidopsis thaliana | 1725 | + | ACGTG      | cis-acting element involved in the abscisic acid responsiveness   |
| PmGASA15 | CCAAT-box   | Hordeum vulgare      | 710  | + | CAACGG     | MYBHv1 binding site                                               |
| PmGASA15 | CGTCA-motif | Hordeum vulgare      | 1723 | - | CGTCA      | cis-acting regulatory element involved in the MeJA-responsiveness |
| PmGASA15 | CGTCA-motif | Hordeum vulgare      | 969  | - | CGTCA      | cis-acting regulatory element involved in the MeJA-responsiveness |
| PmGASA15 | G-box       | Zea mays             | 1724 | - | CACGTC     | cis-acting regulatory element involved in light responsiveness    |
| PmGASA15 | GARE-motif  | Brassica oleracea    | 1073 | + | TCTGTTG    | gibberellin-responsive element                                    |
| PmGASA15 | GT1-motif   | Avena sativa         | 1268 | + | GGTTAAT    | light responsive element                                          |
| PmGASA15 | LTR         | Hordeum vulgare      | 1105 | - | CCGAAA     | cis-acting element involved in low-temperature responsiveness     |
| PmGASA15 | LTR         | Hordeum vulgare      | 1532 | - | CCGAAA     | cis-acting element involved in low-temperature responsiveness     |
| PmGASA15 | MBS         | Arabidopsis thaliana | 1867 | + | CAACTG     | MYB binding site involved in drought-inducibility                 |
| PmGASA15 | MBS         | Arabidopsis thaliana | 1162 | + | CAACTG     | MYB binding site involved in drought-inducibility                 |
| PmGASA15 | TCA-element | Nicotiana tabacum    | 1744 | + | CCATCTTTTT | cis-acting element involved in salicylic acid responsiveness      |
| PmGASA15 | TGACG-motif | Hordeum vulgare      | 1723 | + | TGACG      | cis-acting regulatory element involved in the MeJA-responsiveness |

|          |             |                      |      |   |                  |                                                                      |
|----------|-------------|----------------------|------|---|------------------|----------------------------------------------------------------------|
| PmGASA15 | TGACG-motif | Hordeum vulgare      | 969  | + | TGACG            | cis-acting regulatory element involved in the MeJA-responsiveness    |
| PmGASA16 | CGTCA-motif | Hordeum vulgare      | 678  | - | CGTCA            | cis-acting regulatory element involved in the MeJA-responsiveness    |
| PmGASA16 | CGTCA-motif | Hordeum vulgare      | 227  | - | CGTCA            | cis-acting regulatory element involved in the MeJA-responsiveness    |
| PmGASA16 | CGTCA-motif | Hordeum vulgare      | 1387 | - | CGTCA            | cis-acting regulatory element involved in the MeJA-responsiveness    |
| PmGASA16 | G-box       | Zea mays             | 1030 | - | CACGAC           | cis-acting regulatory element involved in light responsiveness       |
| PmGASA16 | GT1-motif   | Avena sativa         | 92   | + | GGTTAAT          | light responsive element                                             |
| PmGASA16 | LTR         | Hordeum vulgare      | 1958 | - | CCGAAA           | cis-acting element involved in low-temperature responsiveness        |
| PmGASA16 | MBS         | Arabidopsis thaliana | 1918 | + | CAACTG           | MYB binding site involved in drought-inducibility                    |
| PmGASA16 | MBS         | Arabidopsis thaliana | 1191 | - | CAACTG           | MYB binding site involved in drought-inducibility                    |
| PmGASA16 | MBSI        | Petunia hybrida      | 345  | - | aaaAaaC(G/C)GTTA | MYB binding site involved in flavonoid biosynthetic genes regulation |
| PmGASA16 | TCA-element | Nicotiana tabacum    | 1153 | + | CCATCTTTTT       | cis-acting element involved in salicylic acid responsiveness         |
| PmGASA16 | TGA-element | Brassica oleracea    | 1808 | + | AACGAC           | auxin-responsive element                                             |
| PmGASA16 | TGA-element | Brassica oleracea    | 2    | - | AACGAC           | auxin-responsive element                                             |
| PmGASA16 | TGACG-motif | Hordeum vulgare      | 1387 | + | TGACG            | cis-acting regulatory element involved in the MeJA-responsiveness    |

|          |                 |                 |     |   |       |                                                                       |
|----------|-----------------|-----------------|-----|---|-------|-----------------------------------------------------------------------|
| PmGASA16 | TGACG-<br>motif | Hordeum vulgare | 227 | + | TGACG | cis-acting regulatory element involved in the MeJA-<br>responsiveness |
| PmGASA16 | TGACG-<br>motif | Hordeum vulgare | 678 | + | TGACG | cis-acting regulatory element involved in the MeJA-<br>responsiveness |
